# Supplementary material for: Targeted mutagenesis in a human-parasitic nematode
Source: PubMed Central journal article supplement (PMC5650185; doi:10.1371/journal.ppat.1006675), 2017-10-10

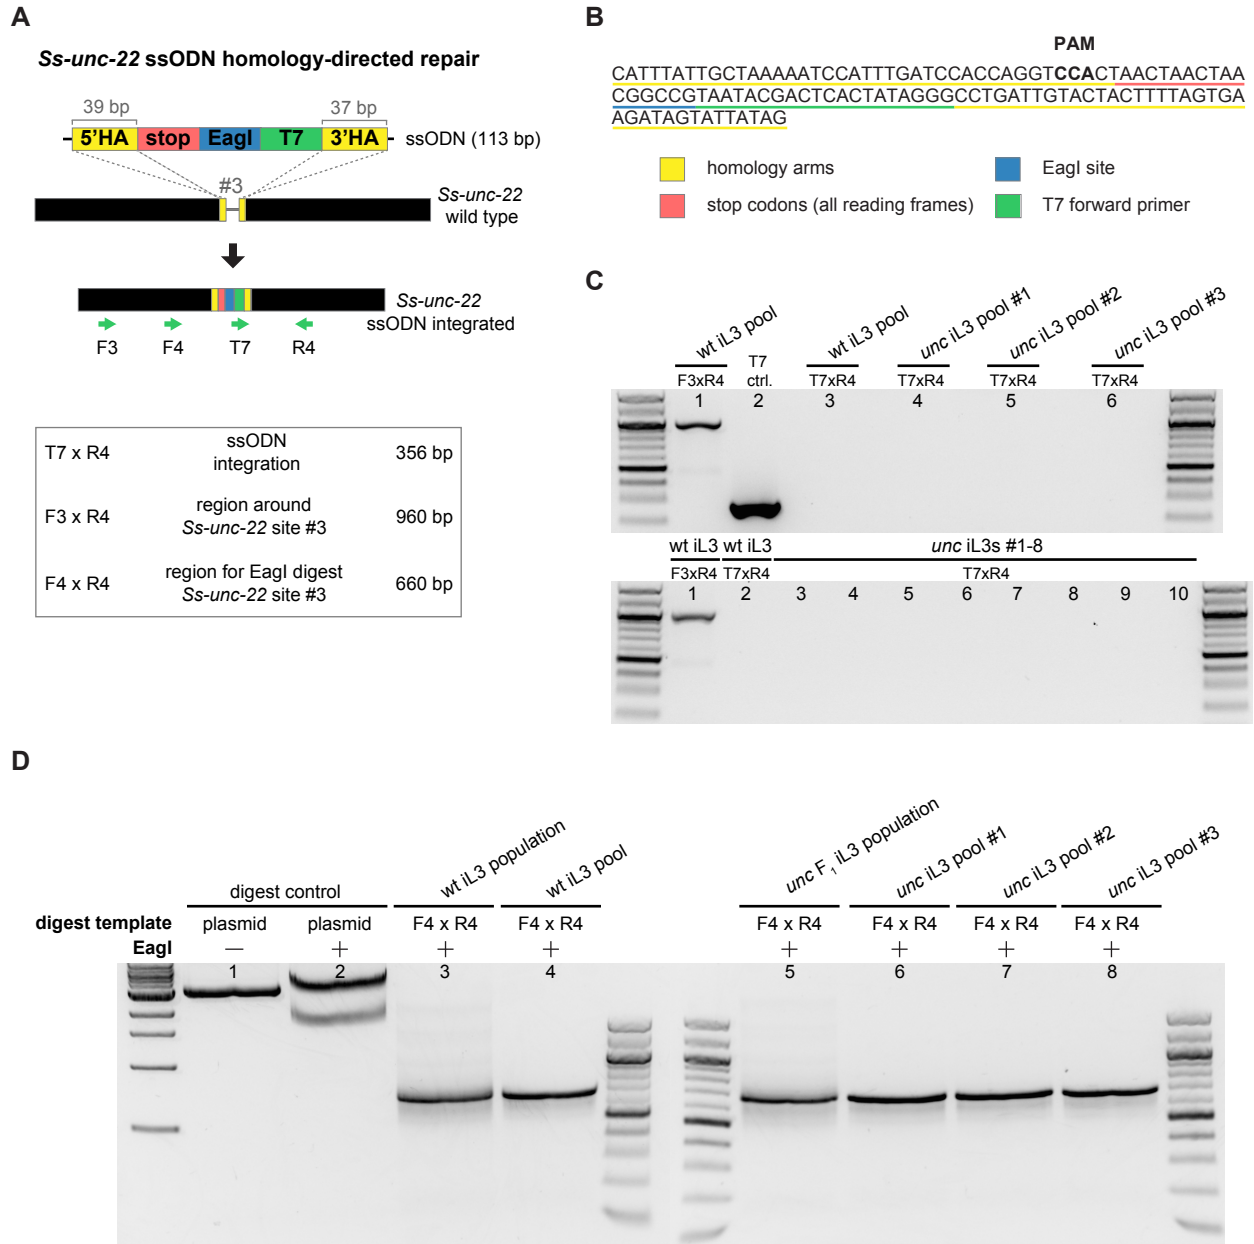

Supplement: ppat.1006675.s008.pdf [file ppat.1006675.s008.pdf]
