# Supplementary material for: Targeted mutagenesis in a human-parasitic nematode
Source: PubMed Central journal article supplement (PMC5650185; doi:10.1371/journal.ppat.1006675), 2017-10-10
Supplement: ppat.1006675.s010.pdf [file ppat.1006675.s010.pdf]

A

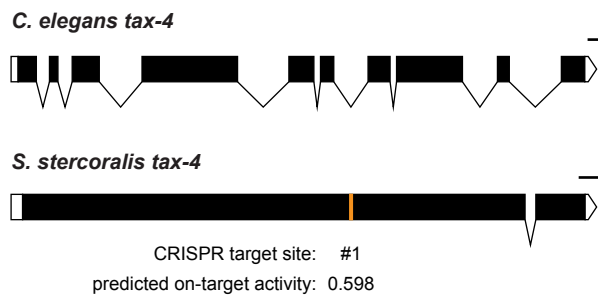

B

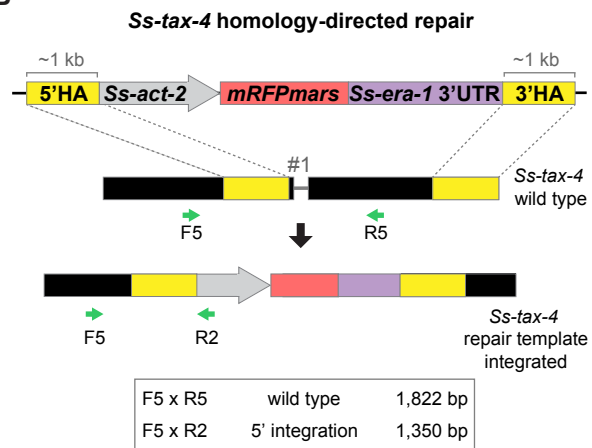

C

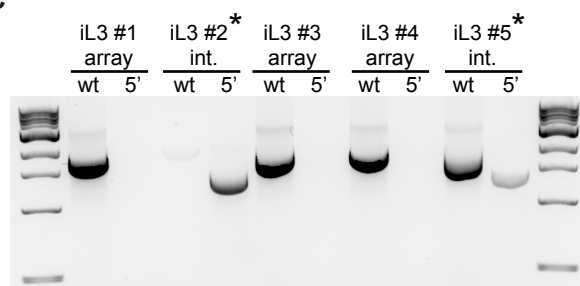

D

## repair template 5' integration

*Ss-tax-4* exon 1

5' homology arm

TATTAAAGTCACAAGTGTCAATTGAACCAATAACTAATAA  
 TCTTTCTAATAATAATTCATGTCTGGTAATAGGCCAATG  
 ACTATGGATACCAAGAATAAAGAAAATGGTAATAAGATGA  
 ATGAGGGTCAAAAAGTTCCTCCAATAGTTAAAATATCTGT  
 TCCAGGGACTGTTAATGATCACGACTCTGAGTTGACTGAT  
 TTAGATCATGATAATGGAATTGATGTTGATGATACTATTG  
 TTATACAAAAAATGACTCACCACCTTTAAGGGATAATTC  
 TAATTCCTCAAAAATGCCAAAGTCCCAAAACAAAATGAG  
 GAAGTTAAAAA.....
