# Supplementary material for: Targeted mutagenesis in a human-parasitic nematode
Source: PubMed Central journal article supplement (PMC5650185; doi:10.1371/journal.ppat.1006675), 2017-10-10
Supplement: ppat.1006675.s011.pdf [file ppat.1006675.s011.pdf]

**S1 Table. Summary of CRISPR-Cas9 targeting efficiency for *Ss-unc-22*.** Results for combined nicotine assay data presented in Fig 3B. The estimated number of F<sub>1</sub> iL3s collected from each injection experiment was based on the average number of iL3s per injected adult calculated in S14 Table.

| target    | delivery | injection experiment | # free-living adults injected (P <sub>0</sub> ) | estimated # F <sub>1</sub> iL3s collected | # iL3s screened  | # twitching (%)  |
|-----------|----------|----------------------|-------------------------------------------------|-------------------------------------------|------------------|------------------|
| wild type | —        | —                    | —                                               | —                                         | <b>1,314</b>     | <b>2 (0.15%)</b> |
| 1         | DNA      | a                    | 29                                              | ~957                                      | 254              | 59 (23%)         |
|           |          | b                    | 31                                              | ~1,023                                    | 192              | 19 (10%)         |
|           |          |                      | <b>60</b>                                       | <b>~1,980</b>                             | <b>446</b>       | <b>78 (17%)</b>  |
| 1         | RNP      | a                    | 27                                              | ~891                                      | 473              | 63 (13%)         |
|           |          | b                    | 22                                              | ~726                                      | 435              | 82 (19%)         |
|           |          |                      | <b>49</b>                                       | <b>~1,617</b>                             | <b>908</b>       | <b>145 (16%)</b> |
| 2         | DNA      | a                    | 31                                              | ~1,023                                    | 222              | 56 (25%)         |
|           |          | b                    | 30                                              | ~990                                      | 123              | 20 (16%)         |
|           |          | c                    | 20                                              | ~660                                      | 332              | 70 (21%)         |
|           |          | <b>81</b>            | <b>~2,673</b>                                   | <b>677</b>                                | <b>146 (22%)</b> |                  |
| 2         | RNP      | a                    | 27                                              | ~891                                      | 668              | 201 (30%)        |
|           |          | b                    | 22                                              | ~726                                      | 362              | 153 (42%)        |
|           |          | c                    | 25                                              | ~825                                      | 254              | 116 (46%)        |
|           |          | <b>74</b>            | <b>~2,442</b>                                   | <b>1,284</b>                              | <b>470 (37%)</b> |                  |
| 3         | DNA      | a                    | 24                                              | ~792                                      | 368              | 88 (24%)         |
|           |          | b                    | 20                                              | ~660                                      | 235              | 80 (34%)         |
|           |          |                      | <b>44</b>                                       | <b>~1,452</b>                             | <b>603</b>       | <b>168 (28%)</b> |
| 3         | RNP      | a                    | 33                                              | ~1,089                                    | 191              | 70 (37%)         |
|           |          | b                    | 28                                              | ~924                                      | 428              | 118 (28%)        |
|           |          |                      | <b>61</b>                                       | <b>~2,013</b>                             | <b>619</b>       | <b>188 (30%)</b> |
