# Supplementary material for: Targeted mutagenesis in a human-parasitic nematode
Source: PubMed Central journal article supplement (PMC5650185; doi:10.1371/journal.ppat.1006675), 2017-10-10
Supplement: ppat.1006675.s013.pdf [file ppat.1006675.s013.pdf]

**S3 Table. Summary of *Ss-unc-22* deletions.** Individual wild-type iL3s, and *unc* F<sub>1</sub> iL3s that displayed a nicotine-twitching phenotype, were collected and genomic DNA was prepared. For each iL3, the region around the *Ss-unc-22* target was PCR-amplified along with a control reaction from a different contig than *Ss-unc-22*, as shown in Fig 4A. Instances where the *Ss-unc-22* target failed to amplify but the control reaction was present were considered putative homozygous deletions of *Ss-unc-22*.

| target        | delivery | repair | # iL3s genotyped | # putative <i>Ss-unc-22</i><br>-/- deletions (%) |
|---------------|----------|--------|------------------|--------------------------------------------------|
| 1 (wild type) | —        | —      | 38               | 0 (0%)                                           |
| 1             | RNP      | —      | 36               | 0 (0%)                                           |
| 2 (wild type) | —        | —      | 76               | 0 (0%)                                           |
| 2             | RNP      | —      | 54               | 1 (1.9%)                                         |
| 3 (wild type) | —        | —      | 46               | 0 (0%)                                           |
| 3             | RNP      | —      | 18               | 1 (5.6%)                                         |
| 3             | RNP      | ssODN  | 119              | 6 (5%)                                           |
