# Supplementary material for: Targeted mutagenesis in a human-parasitic nematode
Source: PubMed Central journal article supplement (PMC5650185; doi:10.1371/journal.ppat.1006675), 2017-10-10
Supplement: ppat.1006675.s014.pdf [file ppat.1006675.s014.pdf]

**S4 Table. Summary of sample preparation for *Ss-unc-22* whole-genome sequencing.** *S. stercoralis* free-living adults were injected with RNP complexes targeting *Ss-unc-22* site #3, including an ssODN, and F<sub>1</sub> iL3s were collected. A subset of F<sub>1</sub> iL3s was screened for nicotine-twitching frequency to estimate the *Ss-unc-22* mutation rate and the remaining population was split in two for iL3 lysis, genomic DNA extraction, and Illumina library preparation. Wild-type iL3s were also screened for nicotine-twitching frequency and an Illumina library was prepared from a wild-type population in parallel with the *Ss-unc-22* libraries.

| target | delivery | repair | # free-living adults injected (P <sub>0</sub> ) | estimated # iL3s collected | # iL3s screened in 1% nicotine | % iL3s twitching in 1% nicotine | # WGS libraries prepared    |
|--------|----------|--------|-------------------------------------------------|----------------------------|--------------------------------|---------------------------------|-----------------------------|
| 3      | RNP      | ssODN  | 280                                             | ~9,240                     | 182                            | 40.7%                           | 2 ( <i>Ss-unc-22</i> A + B) |
| —      | —        | —      | —                                               | ~5,000                     | 154                            | 0%                              | 1 (wild type)               |
