# Supplementary material for: Targeted mutagenesis in a human-parasitic nematode
Source: PubMed Central journal article supplement (PMC5650185; doi:10.1371/journal.ppat.1006675), 2017-10-10
Supplement: ppat.1006675.s016.pdf [file ppat.1006675.s016.pdf]

**S6 Table. Summary of HDR in *S. stercoralis*.** Free-living adult females were injected with CRISPR-Cas9 plasmid vectors and repair template targeting either *Ss-unc-22* site #2 or *Ss-tax-4* site #1. Individual F<sub>1</sub> iL3s expressing *mRFPmars* were genotyped for repair template integration as shown in Fig 5 and S10 Fig.

| gene             | target | delivery | repair | # free-living adults injected (P <sub>0</sub> ) | # red iL3s collected | # red iL3s genotyped | # repair-template-integrated iL3s | # putative -/- knockouts | % integrated |
|------------------|--------|----------|--------|-------------------------------------------------|----------------------|----------------------|-----------------------------------|--------------------------|--------------|
| <i>Ss-unc-22</i> | 2      | DNA      | pEY09  | 21                                              | 53                   | 21                   | 12                                | 5                        | 57%          |
| <i>Ss-unc-22</i> | 2      | DNA      | pEY09  | 29                                              | 55                   | 16                   | 12                                | 6                        | 75%          |
| <i>Ss-tax-4</i>  | 1      | DNA      | pMLC39 | 21                                              | 72                   | 19                   | 8                                 | 0                        | 42%          |
