# Supplementary material for: Targeted mutagenesis in a human-parasitic nematode
Source: PubMed Central journal article supplement (PMC5650185; doi:10.1371/journal.ppat.1006675), 2017-10-10
Supplement: ppat.1006675.s017.pdf [file ppat.1006675.s017.pdf]

**S7 Table. Host infection and germline transmission of *Ss-unc-22* mutations.** Summary of host passage strategies for wild-type control, 50/50 mixed *unc* and wild-type, and *unc*-enriched infections. Results for total recovery of F<sub>2</sub> and F<sub>3</sub> progeny for each injection strategy, and the combined nicotine-assay data presented in Fig 6B, are provided. n.a. = not available; the number of iL3s recovered was not recorded for these experiments.

**I. microinjection of free-living adults, F<sub>1</sub> iL3 collection, and host infection**

| infection strategy                | target | repair | # free-living adults injected (P <sub>0</sub> ) | estimated # F <sub>1</sub> iL3s collected | # gerbil hosts infected | estimated dose (iL3s/host) | % <i>unc</i> iL3s into host |
|-----------------------------------|--------|--------|-------------------------------------------------|-------------------------------------------|-------------------------|----------------------------|-----------------------------|
| control - wt                      | —      | —      | —                                               | —                                         | 2                       | ~800                       | 0%                          |
| strategy 1 - <i>unc</i> and wt    | 3      | ssODN  | 110                                             | ~3,630                                    | 2                       | ~1,750                     | 52.5%                       |
| strategy 2 - <i>unc</i> -enriched | 3      | ssODN  | 134                                             | ~4,422                                    | 2                       | ~1,200                     | >95%                        |

**II. 1% nicotine screen of F<sub>2</sub> and F<sub>3</sub> progeny**

| infection strategy                | life stage screened                   | day screened post-infection | # nematodes recovered | # nematodes screened | # twitching (%)  |
|-----------------------------------|---------------------------------------|-----------------------------|-----------------------|----------------------|------------------|
| control - wt                      | F <sub>2</sub> or F <sub>3</sub> iL3s | 22                          | ~12,000               | 1,549                | 0 (0%)           |
|                                   |                                       | 23                          | ~14,000               | 1,148                | 0 (0%)           |
|                                   |                                       | 24                          | ~26,400               | 1,152                | 0 (0%)           |
|                                   |                                       |                             | <b>~52,400</b>        | <b>3,849</b>         | <b>0 (0%)</b>    |
| control - wt                      | F <sub>2</sub> free-living adults     | 25                          | 23 (14♀, 9♂)          | 23                   | 0 (0%)           |
|                                   |                                       | 26                          | 98 (73♀, 25♂)         | 98                   | 0 (0%)           |
|                                   |                                       | 27                          | 178 (145♀, 33♂)       | 178                  | 0 (0%)           |
|                                   |                                       | 28                          | 33 (19♀, 14♂)         | 33                   | 0 (0%)           |
|                                   |                                       | <b>332</b>                  | <b>332</b>            | <b>0 (0%)</b>        |                  |
| strategy 1 - <i>unc</i> and wt    | F <sub>2</sub> or F <sub>3</sub> iL3s | 21                          | n.a.                  | 614                  | 8 (1.3%)         |
|                                   |                                       | 23                          | n.a.                  | 700                  | 4 (0.6%)         |
|                                   |                                       | 25                          | n.a.                  | 594                  | 10 (1.7%)        |
|                                   |                                       |                             | <b>n.a.</b>           | <b>1,908</b>         | <b>22 (1.2%)</b> |
| strategy 2 - <i>unc</i> -enriched | F <sub>2</sub> or F <sub>3</sub> iL3s | 22                          | 2,707                 | 1,099                | 20 (1.8%)        |
|                                   |                                       | 23                          | 3,782                 | 710                  | 22 (3.1%)        |
|                                   |                                       | 24                          | 4,023                 | 885                  | 29 (3.3%)        |
|                                   |                                       |                             | <b>10,512</b>         | <b>2,694</b>         | <b>71 (2.6%)</b> |
| strategy 2 - <i>unc</i> -enriched | F <sub>2</sub> free-living adults     | 25                          | 21 (13♀, 8♂)          | 21                   | 1 (5%)           |
|                                   |                                       | 26                          | 83 (59♀, 24♂)         | 83                   | 6 (7%)           |
|                                   |                                       | 27                          | 50 (38♀, 12♂)         | 50                   | 1 (2%)           |
|                                   |                                       | 28                          | 10 (9♀, 1♂)           | 10                   | 1 (10%)          |
|                                   |                                       | <b>164</b>                  | <b>164</b>            | <b>9 (5.5%)</b>      |                  |
