# Supplementary material for: Targeted mutagenesis in a human-parasitic nematode
Source: PubMed Central journal article supplement (PMC5650185; doi:10.1371/journal.ppat.1006675), 2017-10-10
Supplement: ppat.1006675.s018.pdf [file ppat.1006675.s018.pdf]

**S8 Table. Plasmid vectors for *Strongyloides* CRISPR-Cas9.** pPV540, provided by Dr. James Lok, was modified from pPV402, which is described in Shao *et al.* 2012 [45]. pEY09 and pMLC39 were modified from pAJ50, which is described in Junio *et al.* 2008 [31].

| construct | description                                                             | backbone                                   |           |
|-----------|-------------------------------------------------------------------------|--------------------------------------------|-----------|
| pPV540    | ( <i>Sr-eef-1A<sub>pro</sub>::Cas9::Ss-era-1</i> 3'UTR)                 | <i>Strongyloides</i> codon-optimized Cas9  | pPV402    |
| pMLC56    | ( <i>Sr-U6<sub>pro</sub>::Ss-unc-22-sgRNA-1::Sr-U6</i> 3'UTR)           | sgRNA for <i>Ss-unc-22</i> site #1         | pUC57-Kan |
| pMLC57    | ( <i>Sr-U6<sub>pro</sub>::Sr-unc-22-sgRNA-1::Sr-U6</i> 3'UTR)           | sgRNA for <i>Sr-unc-22</i> site #1         | pUC57-Kan |
| pMLC58    | ( <i>Sr-U6<sub>pro</sub>::Ss-unc-22-sgRNA-3::Sr-U6</i> 3'UTR)           | sgRNA for <i>Ss-unc-22</i> site #3         | pUC57-Kan |
| pMLC60    | ( <i>Sr-U6<sub>pro</sub>::Ss-unc-22-sgRNA-2::Sr-U6</i> 3'UTR)           | sgRNA for <i>Ss-unc-22</i> site #2         | pUC57-Kan |
| pMLC61    | ( <i>Sr-U6<sub>pro</sub>::Sr-unc-22-sgRNA-2::Sr-U6</i> 3'UTR)           | sgRNA for <i>Sr-unc-22</i> site #2         | pUC57-Kan |
| pEY09     | (5'HA:: <i>Ss-act-2<sub>pro</sub>::mRFPmars::Ss-era-1</i> 3' UTR::3'HA) | HDR construct for <i>Ss-unc-22</i> site #2 | pAJ50     |
| pMLC47    | ( <i>Sr-U6<sub>pro</sub>::Ss-tax-4-sgRNA-1::Sr-U6</i> 3'UTR)            | sgRNA for <i>Ss-tax-4</i> site #1          | pUC57-Kan |
| pMLC39    | (5'HA:: <i>Ss-act-2<sub>pro</sub>::mRFPmars::Ss-era-1</i> 3' UTR::3'HA) | HDR construct for <i>Ss-tax-4</i> site #1  | pAJ50     |
