# Supplementary material for: Targeted mutagenesis in a human-parasitic nematode
Source: PubMed Central journal article supplement (PMC5650185; doi:10.1371/journal.ppat.1006675), 2017-10-10
Supplement: ppat.1006675.s019.pdf [file ppat.1006675.s019.pdf]

**S9 Table. *Strongyloides* CRISPR target sequences.** The PAM for each target sequence is underlined. Note that each target sequence contains guanine residues in the 1<sup>st</sup>, 19<sup>th</sup>, and 20<sup>th</sup> positions (GN(17)GG), as recommended in Farboud *et al.* 2015 [49].

| <u>target</u>            | <u>sequence</u>                 |
|--------------------------|---------------------------------|
| <i>Ss-unc-22</i> site #1 | GTCCAGACCAATTCTGGTGG <u>TGG</u> |
| <i>Ss-unc-22</i> site #2 | GGATCAGTTGACAATAATGG <u>TGG</u> |
| <i>Ss-unc-22</i> site #3 | GTACAATCAGGTGTTCCAGG <u>TGG</u> |
| <i>Sr-unc-22</i> site #1 | GTCCAAACCAATTCTGGAGG <u>TGG</u> |
| <i>Sr-unc-22</i> site #2 | GGATCAACAGATAATAATGG <u>TGG</u> |
| <i>Ss-tax-4</i> site #1  | GTAACATTTGACTTGATGGG <u>TGG</u> |

**PAM**
