# Supplementary material for: Targeted mutagenesis in a human-parasitic nematode
Source: PubMed Central journal article supplement (PMC5650185; doi:10.1371/journal.ppat.1006675), 2017-10-10
Supplement: ppat.1006675.s020.pdf [file ppat.1006675.s020.pdf]

**S10 Table. Plasmid vector injection mixes for *Strongyloides* CRISPR-Cas9.** Injection mixes introduced into *Strongyloides* free-living adult females were limited to a maximum final DNA concentration of 100 ng/ $\mu$ L, as previously described in Junio *et al.* 2008 [31].

**plasmid vectors *Ss-unc-22* site #1**

| component | concentration  |
|-----------|----------------|
| pMLC56    | 60 ng/ $\mu$ L |
| pPV540    | 20 ng/ $\mu$ L |

**plasmid vectors *Ss-unc-22* site #2**

| component | concentration  |
|-----------|----------------|
| pMLC60    | 60 ng/ $\mu$ L |
| pPV540    | 20 ng/ $\mu$ L |

**plasmid vectors *Ss-unc-22* site #3**

| component | concentration  |
|-----------|----------------|
| pMLC58    | 60 ng/ $\mu$ L |
| pPV540    | 20 ng/ $\mu$ L |

**plasmid vectors *Sr-unc-22* site #1**

| component | concentration  |
|-----------|----------------|
| pMLC57    | 60 ng/ $\mu$ L |
| pPV540    | 20 ng/ $\mu$ L |

**plasmid vectors *Sr-unc-22* site #2**

| component | concentration  |
|-----------|----------------|
| pMLC61    | 60 ng/ $\mu$ L |
| pPV540    | 20 ng/ $\mu$ L |

**plasmid vectors *Ss-unc-22* site #2 + repair template**

| component | concentration  |
|-----------|----------------|
| pMLC60    | 60 ng/ $\mu$ L |
| pPV540    | 20 ng/ $\mu$ L |
| pEY09     | 20 ng/ $\mu$ L |

**plasmid vectors *Ss-unc-22* site #2 + repair template (w/o Cas9)**

| component | concentration  |
|-----------|----------------|
| pMLC60    | 60 ng/ $\mu$ L |
| pEY09     | 20 ng/ $\mu$ L |

**plasmid vectors *Ss-tax-4* site #1 + repair template**

| component | concentration  |
|-----------|----------------|
| pMLC47    | 25 ng/ $\mu$ L |
| pPV540    | 25 ng/ $\mu$ L |
| pMLC39    | 30 ng/ $\mu$ L |
