# Supplementary material for: Targeted mutagenesis in a human-parasitic nematode
Source: PubMed Central journal article supplement (PMC5650185; doi:10.1371/journal.ppat.1006675), 2017-10-10
Supplement: ppat.1006675.s021.pdf [file ppat.1006675.s021.pdf]

**S11 Table. *Ss-unc-22* crRNA sequences.** The first 20 nucleotides of each crRNA match the genomic DNA of the CRISPR target site indicated. The remaining nucleotides are the *Streptococcus pyogenes* repeat sequence and are identical for all three crRNAs shown.

| <u>target</u>                  | <u>sequence</u>                            |
|--------------------------------|--------------------------------------------|
| <i>Ss-unc-22</i> site #1 crRNA | GUCCAGACCAAUUCUGGUGGGUUUUAGAGCUAUGCUGUUUUG |
| <i>Ss-unc-22</i> site #2 crRNA | GGAUCAGUUGACAAUAAUGGGUUUUAGAGCUAUGCUGUUUUG |
| <i>Ss-unc-22</i> site #3 crRNA | GUACAAUCAGGUGUCCAGGGUUUUAGAGCUAUGCUGUUUUG  |
