# Supplementary material for: Targeted mutagenesis in a human-parasitic nematode
Source: PubMed Central journal article supplement (PMC5650185; doi:10.1371/journal.ppat.1006675), 2017-10-10
Supplement: ppat.1006675.s023.pdf [file ppat.1006675.s023.pdf]

**S13 Table. Primer sets used in this study.**

| primer set (5' → 3') |                                 | description                                                                        | size (bp) | notes                               |
|----------------------|---------------------------------|------------------------------------------------------------------------------------|-----------|-------------------------------------|
| forward              | CCTGATATTACTGATTGGGATACTGATAGA  | region around <i>Ss-unc-22</i> site #1                                             | 678       |                                     |
| reverse              | ATAATGATCAATAGGAATCCACCATCATC   |                                                                                    |           |                                     |
| forward              | AATTA AAAATATACTTCTCTGGTCTGCTCC | region around <i>Ss-unc-22</i> site #2                                             | 835       |                                     |
| reverse              | TCCACCCTCATTACATGGTATAAATGTATA  |                                                                                    |           |                                     |
| forward              | CTGTCTTAGATGCACCAGGAAAAC        | region around <i>Ss-unc-22</i> site #3<br>region for ssODN insertion + EagI digest | 660       | Fig 4<br>S5 Fig<br>S8 Fig - F4 x R4 |
| reverse              | ATGCAGTAATATCATGTCCAAGAGC       |                                                                                    |           |                                     |
| forward              | ATTGTTGGTGATGTTGCTGAAATTC       | 10 kb upstream of <i>Ss-unc-22</i> site #3                                         | 525       | S5 Fig                              |
| reverse              | ATAACTTGTAATTGGTGCACCTCC        |                                                                                    |           |                                     |
| forward              | ATTTTCCTGTAAAACGATTAACACCG      | 10 kb downstream of <i>Ss-unc-22</i> site #3                                       | 500       | S5 Fig                              |
| reverse              | TTTTATGCACGAATTTTGTCTTTCAATAC   |                                                                                    |           |                                     |
| forward              | TACATGGATTGCACCTGTTGATAATG      | wild-type locus for <i>Ss-unc-22</i> site #2                                       | 1,092     | Fig 5 - F1 x R1                     |
| reverse              | ACAGGATCAGTTGACAATAATGGTG       |                                                                                    |           |                                     |
| forward              | TACATGGATTGCACCTGTTGATAATG      | 5' border of integration for <i>Ss-unc-22</i> site #2                              | 1,200     | Fig 5 - F1 x R2                     |
| reverse              | CGAGGTACCTCTTTTCCACACTT         |                                                                                    |           |                                     |
| forward              | AAACAGAAACAGATTGGGTCTCT         | 3' border of integration for <i>Ss-unc-22</i> site #2                              | 1,036     | Fig 5 - F2 x R3                     |
| reverse              | CATTAAATTGACCTTCAGCAGAACC       |                                                                                    |           |                                     |
| forward              | GTATTCCTTCTATTGTTGGAAGACC       | genomic DNA control ( <i>Ss-act-2</i> exon 1)                                      | 416       | Fig 4<br>Fig 5<br>S5 Fig            |
| reverse              | CCTTCATAGATTGGTACAGTGTGAG       |                                                                                    |           |                                     |
| forward              | ATTAAAGAGGCATGGGATCTTGATG       | 5' homology arm for <i>Ss-unc-22</i> site #2                                       | 640       |                                     |
| reverse              | GACCTTGTCATTTTCACTTACTGC        |                                                                                    |           |                                     |
| forward              | TAGCAACTCTTCCATTTAATCCACC       | 3' homology arm for <i>Ss-unc-22</i> site #2                                       | 633       |                                     |
| reverse              | ATTTAGGTGGTACAAAAACACGTGG       |                                                                                    |           |                                     |
| forward              | TGACAAAAATCAAAATGCTCCTGG        | wild-type locus for <i>Ss-unc-22</i> site #3                                       | 960       | S8 Fig - F3 x R4                    |
| reverse              | ATGCAGTAATATCATGTCCAAGAGC       |                                                                                    |           |                                     |
| forward              | TAATACGACTCACTATAGGG (T7)       | ssODN integration for <i>Ss-unc-22</i> site #3                                     | 356       | S8 Fig - T7 x R4                    |
| reverse              | ATGCAGTAATATCATGTCCAAGAGC       |                                                                                    |           |                                     |
| forward              | TTATCCACCCCGAAGAAGTAAGC         | wild-type locus for <i>Ss-tax-4</i> site #1                                        | 1,822     | S10 Fig - F5 x R5                   |
| reverse              | CCCAACAGATCTAACATTAGCCG         |                                                                                    |           |                                     |
| forward              | TTATCCACCCCGAAGAAGTAAGC         | 5' border of integration for <i>Ss-tax-4</i> site #1                               | 1,350     | S10 Fig - F5 x R2                   |
| reverse              | CGAGGTACCTCTTTTCCACACTT         |                                                                                    |           |                                     |
| forward              | TGATCAGACTCTGAGTTGACTG          | 5' homology arm for <i>Ss-tax-4</i> site #1                                        | 1,001     |                                     |
| reverse              | CTGGACCAGGAACCTCACAATA          |                                                                                    |           |                                     |
| forward              | CGTCTAACGGCTGAATATACTAA         | 3' homology arm for <i>Ss-tax-4</i> site #1                                        | 1,045     |                                     |
| reverse              | TGTTTTCGCTTCTTTTGTATGACA        |                                                                                    |           |                                     |
