# Supplementary material for: Targeted mutagenesis in a human-parasitic nematode
Source: PubMed Central journal article supplement (PMC5650185; doi:10.1371/journal.ppat.1006675), 2017-10-10
Supplement: ppat.1006675.s024.pdf [file ppat.1006675.s024.pdf]

**S14 Table. The average number of F<sub>1</sub> iL3s collected per microinjected free-living adult female for *S. stercoralis* and *S. ratti*.** Injected free-living adult females were reared on host feces based on the observation that it results in higher reproductive output relative to other standard culturing methods [53]. iL3s were collected using a Baermann apparatus and all F<sub>1</sub> progeny were counted to calculate the average number of iL3s per injected adult.

| species               | post-injection culturing method | # free-living adults injected (P <sub>0</sub> ) | # F <sub>1</sub> iL3s collected | # F <sub>1</sub> iL3s / injected adult |
|-----------------------|---------------------------------|-------------------------------------------------|---------------------------------|----------------------------------------|
| <i>S. stercoralis</i> | fecal charcoal                  | 29                                              | 862                             | 29.7                                   |
|                       | fecal charcoal                  | 30                                              | 909                             | 30.3                                   |
|                       | fecal charcoal                  | 29                                              | 1,113                           | 38.4                                   |
|                       | fecal charcoal                  | 37                                              | 1,105                           | 29.9                                   |
|                       | fecal charcoal                  | 32                                              | 1,196                           | 37.4                                   |
|                       |                                 |                                                 |                                 | <b>33 iL3s / injected adult</b>        |
| <i>S. ratti</i>       | chemotaxis plate + rat feces    | 45                                              | 1,012                           | 22.5                                   |
|                       | fecal charcoal                  | 20                                              | 358                             | 17.9                                   |
|                       | fecal charcoal                  | 40                                              | 1,319                           | 33.0                                   |
|                       |                                 |                                                 |                                 | <b>25 iL3s / injected adult</b>        |
